# Supplementary material for: Probabilistic Risk Assessment of Heavy Metals in Mining Soils Based on Fractions: A Case Study in Southern Shaanxi, China
Source: MDPI journal article supplement (doi:10.3390/toxics11120997), 2023-12-07
Supplement: s1 [file s1]

# Supplementary Materials

## Probabilistic risk assessment of heavy metals in mining soils based on fractions: A case study in southern Shaanxi, China

Lei Han<sup>1,2\*</sup>, Yamin Fan<sup>1</sup>, Rui Chen<sup>3</sup>, Yunmeng Zhai<sup>1</sup>, Zhao Liu<sup>1,2</sup>, Yonghua Zhao<sup>1,2</sup>, Risheng Li<sup>4</sup>, Longfei Xia<sup>4</sup>

*1 School of Land Engineering, Chang'an University, Xi'an 710054, China*

*2 Shaanxi Key Laboratory of Land Consolidation, Xi'an 710054, China*

*3 School of Earth Science and Resources, Chang'an University, Xi'an 710054, China*

*4 Shaanxi Provincial Land Engineering Construction Group, Xi'an 710075, China*

**\*Corresponding author:** School of Land Engineering, Chang'an University, Xi'an 710054, China

**E-mail addresses:** [hanshuanglei@chd.edu.cn](mailto:hanshuanglei@chd.edu.cn) (L. H.)

**Tables:** 7

**Figures:** 2

**Pages:** 8

## Tables

**Table S1.** Modified BCR sequential extraction procedure

**Table S2.** The modified Hakanson index method risk degree classification standard

**Table S3.** Environmental background values for heavy metals (HMs) in yellow-brown loam

**Table S4.** Concentrations of total heavy metals in the study area

**Table S5.** Concentrations of the heavy metal fractions in the study area

**Table S6.** Comparison of potential ecological risk of HMs in soil based on the Hakanson index and modified Hakanson index

**Table S7.** Probability of the ecological hazard index of HMs at different risk degrees (%)

## Figures

**Figure S1.** Cumulative frequencies distribution of ecological risk index of heavy metals

**Figure S2.** Sensitivity analysis of comprehensive ecological hazard index

**Table S1.** Modified BCR sequential extraction procedure [1-3]

| Fractions | Extractant                                                                                               | Equilibrium condition                                                                                       |
|-----------|----------------------------------------------------------------------------------------------------------|-------------------------------------------------------------------------------------------------------------|
| F1        | 40ml 0.11mol/L Hac<br>boiling cooling, pH 7.0<br>water                                                   | Shake 16h, centrifuge 20min, supernatant to<br>be tested                                                    |
| F2        | 40ml 0.5mol/L<br>NH <sub>2</sub> OH·HCl                                                                  |                                                                                                             |
| F3        | 10ml H <sub>2</sub> O <sub>2</sub> /10ml H <sub>2</sub> O <sub>2</sub><br>50ml 1mol/L NH <sub>4</sub> Ac | Digestion at 25 °C and water bath for 1 h<br>each; Shake 16h, centrifuge 20min,<br>supernatant to be tested |
| F4        | HCl-HNO <sub>3</sub> -HF                                                                                 | 0.1g dried solid residue microwave<br>digestion constant volume standby                                     |

**Table S2.** The modified Hakanson index method risk degree classification standard [4,5]

| Risk Degree | Low | Moderate | Considerate | High    | Very high |
|-------------|-----|----------|-------------|---------|-----------|
| $E_r^i$     | <10 | 10-20    | 20-40       | 40-80   | >80       |
| RI          | <30 | 30-60    | 60-120      | 120-240 | >240      |

**Table S3.** Environmental background values for heavy metals (HMs) in yellow-brown loam [6]

| HMs | Min/<br>mg/kg | Max/<br>mg/kg | Mean/<br>mg/kg | SD    |
|-----|---------------|---------------|----------------|-------|
| Cr  | 8.0           | 275.6         | 66.9           | 25.75 |
| Ni  | 1.0           | 142           | 31.5           | 14.73 |
| Cu  | 5.0           | 144.6         | 23.4           | 10.84 |
| Zn  | 22.9          | 283.0         | 71.8           | 24.07 |
| As  | 0.7           | 89.5          | 11.8           | 6.21  |
| Pb  | 11.1          | 234.0         | 29.2           | 12.1  |

**Table S4.** Concentrations of total heavy metals in the study area

| HMs | Max/<br>mg/kg | Min/<br>mg/kg | Mean/<br>mg/kg | SD     | CV/% |
|-----|---------------|---------------|----------------|--------|------|
| Cr  | 136.76        | 42.55         | 89.62          | 32.63  | 36   |
| Ni  | 64.08         | 38.08         | 47.57          | 6.80   | 14   |
| Cu  | 83.91         | 36.67         | 54.00          | 13.82  | 26   |
| Zn  | 141.76        | 70.86         | 110.08         | 22.29  | 20   |
| As  | 2030.70       | 51.11         | 1080.83        | 695.05 | 64   |
| Pb  | 72.90         | 30.86         | 45.73          | 12.03  | 26   |

**Table S5.** Concentrations of the heavy metal fractions in the study area

| HMs | Fractions | Max/<br>mg/kg | Min/<br>mg/kg | Mean/<br>mg/kg | SD    | CV/%   | S-W Test  | Significance |
|-----|-----------|---------------|---------------|----------------|-------|--------|-----------|--------------|
| Cr  | F1        | 62.66         | 2.10          | 26.80          | 17.92 | 66.88  | Normal    | 0.391        |
|     | F2        | 2.39          | 0.01          | 1.40           | 0.59  | 42.35  | Normal    | 0.542        |
|     | F3        | 2.80          | 0.01          | 0.60           | 0.86  | 142.00 | Lognormal | 0.000        |
|     | F4        | 87.68         | 30.87         | 60.82          | 19.80 | 32.55  | Normal    | 0.126        |
| Ni  | F1        | 31.07         | 1.76          | 8.52           | 6.76  | 79.42  | Lognormal | 0.000        |
|     | F2        | 8.40          | 3.16          | 5.65           | 1.65  | 29.13  | Normal    | 0.506        |
|     | F3        | 5.00          | 1.47          | 3.17           | 1.16  | 36.76  | Normal    | 0.286        |
|     | F4        | 38.70         | 17.05         | 30.05          | 5.95  | 19.81  | Normal    | 0.437        |

|    |    |         |       |        |        |        |           |       |
|----|----|---------|-------|--------|--------|--------|-----------|-------|
| Cu | F1 | 31.16   | 3.56  | 12.92  | 7.83   | 60.62  | Lognormal | 0.027 |
|    | F2 | 44.59   | 3.10  | 11.76  | 9.39   | 79.81  | Lognormal | 0.000 |
|    | F3 | 4.82    | 0.10  | 1.08   | 1.45   | 133.44 | Lognormal | 0.000 |
|    | F4 | 47.83   | 14.16 | 28.23  | 8.70   | 30.82  | Lognormal | 0.036 |
| Zn | F1 | 66.65   | 19.19 | 37.47  | 12.56  | 33.52  | Normal    | 0.188 |
|    | F2 | 17.59   | 3.59  | 9.09   | 3.94   | 43.34  | Normal    | 0.479 |
|    | F3 | 5.38    | 0.41  | 1.93   | 1.28   | 66.19  | Normal    | 0.077 |
|    | F4 | 93.54   | 33.73 | 62.40  | 17.26  | 27.65  | Normal    | 0.610 |
| As | F1 | 886.71  | 23.90 | 346.56 | 283.55 | 81.82  | Normal    | 0.132 |
|    | F2 | 1024.77 | 0.38  | 266.41 | 291.73 | 109.51 | Abnormal  | 0.006 |
|    | F3 | 7.68    | 0.00  | 2.96   | 2.52   | 85.32  | Normal    | 0.101 |
|    | F4 | 1062.57 | 8.48  | 464.90 | 506.27 | 108.90 | Lognormal | 0.004 |
| Pb | F1 | 15.39   | 0.27  | 5.03   | 4.37   | 86.87  | Lognormal | 0.039 |
|    | F2 | 31.57   | 1.04  | 12.99  | 7.17   | 55.19  | Normal    | 0.136 |
|    | F3 | 0.43    | 0.01  | 0.11   | 0.13   | 115.40 | Lognormal | 0.002 |
|    | F4 | 64.79   | 13.95 | 27.59  | 13.88  | 50.31  | Lognormal | 0.004 |

**Table S6.** Comparison of potential ecological risk of HMs in soil based on the Hakanson index and modified Hakanson index

| The ecological hazard index |                | Cr        | Ni    | Cu       | Zn   | As        | Pb       |
|-----------------------------|----------------|-----------|-------|----------|------|-----------|----------|
| Hakanson index method       | $E_r^i$ (Max)  | 4.08      | 9.45  | 15.87    | 1.96 | 1440.21   | 21.45    |
|                             | $E_r^i$ (Min)  | 1.27      | 5.62  | 6.94     | 0.98 | 36.25     | 9.08     |
|                             | $E_r^i$ (Mean) | 2.68      | 7.02  | 10.21    | 1.52 | 766.54    | 13.45    |
|                             | Risk degree    | Low       | Low   | Moderate | Low  | Very high | Moderate |
|                             | RI (Mean)      | 801.43    |       |          |      |           |          |
|                             | Risk degree    | Very high |       |          |      |           |          |
| Modified                    | $E_r^i$ (Max)  | 4.23      | 10.70 | 15.59    | 2.15 | 1602.96   | 15.36    |

|         |                |      |      |      |           |           |          |
|---------|----------------|------|------|------|-----------|-----------|----------|
| Hakanso | $E_r^i$ (Min)  | 2.23 | 5.06 | 6.25 | 1.03      | 49.87     | 7.36     |
| n index | $E_r^i$ (Mean) | 2.96 | 6.08 | 9.54 | 1.50      | 765.84    | 11.09    |
| method  | Risk degree    | Low  | Low  | Low  | Low       | Very high | Moderate |
|         | RI (Mean)      |      |      |      | 797.00    |           |          |
|         | Risk degree    |      |      |      | Very high |           |          |

**Table S7.** Probability of the ecological hazard index of HMs at different risk degrees (%).

| Risk Degree | Cr     | Ni    | Cu    | Zn     | As    | Pb    | RI    |
|-------------|--------|-------|-------|--------|-------|-------|-------|
| Low         | 100.00 | 97.21 | 64.75 | 100.00 | 7.51  | 36.15 | 7.28  |
| Moderate    | 0      | 2.63  | 34.89 | 0      | 0.21  | 63.85 | 0.65  |
| Considerate | 0      | 0.15  | 0.37  | 0      | 0.44  | 0     | 1.41  |
| High        | 0      | 0.01  | 0     | 0      | 0.93  | 0     | 3.99  |
| Very high   | 0      | 0     | 0     | 0      | 90.91 | 0     | 86.66 |

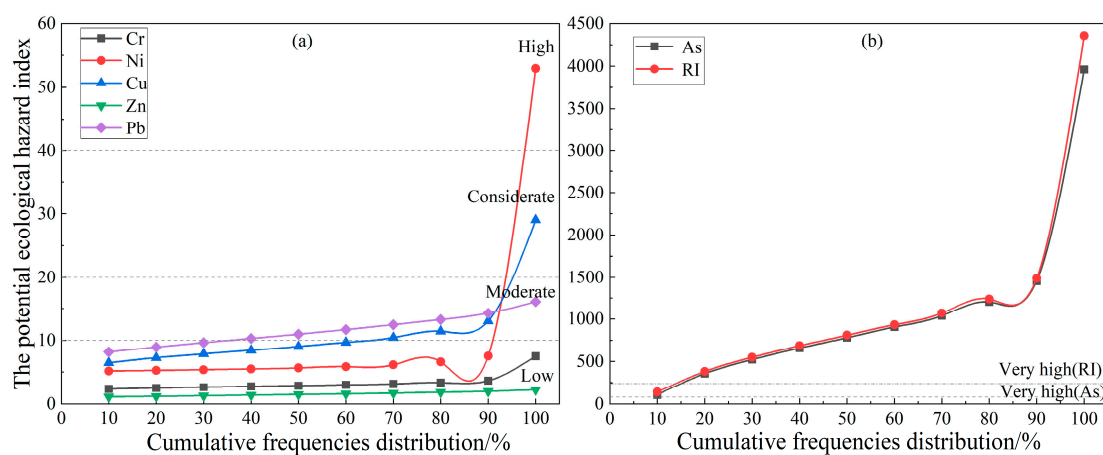

**Figure S1.** Cumulative frequencies distribution of ecological risk index of (a) Cr, Ni, Cu, Zn and Pb; (b) As and RI

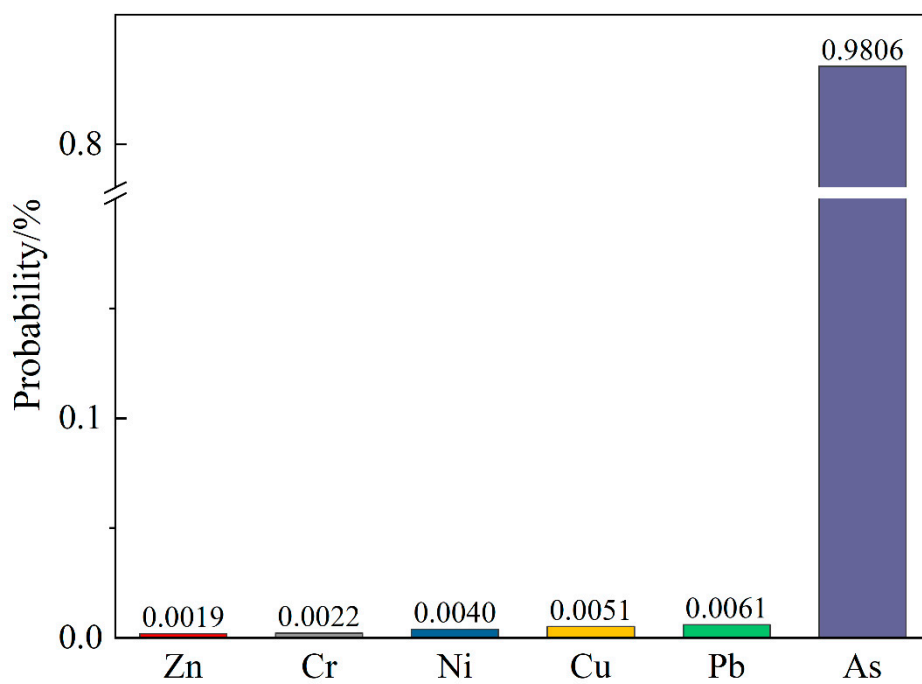

**Figure S2.** Sensitivity analysis of comprehensive ecological hazard index

## References

1. GB/T 25282-2010: Extraction procedure for the morphological order of 13 trace elements in soils and sediments. Ministry of Land and Resources of the People's Republic of China, **2010**. <https://www.instrument.com.cn/download/shtml/186602.shtml>. Accessed on 10 November 2010.
2. Demirak, A.; Kocakaya, M.; Keskin, F. Chemical fractions of toxic metals and assessment of risks on the environment and health in Mugla topsoils. *Int J Environ Sci Technol*, **2022**, 19 (6): 5631–5648.
3. Rauret, G.; Lopez-Sanchez, J.F.; Sahuquillo, A. Improvement of the BCR three step sequential extraction procedure prior to the certification of new sediment and soil reference materials. *J Environ Monit* **1999**, 1(1): 57-61
4. Ma, J.; Han, C.; Jiang, Y. Some issues in the application of potential ecological risk index method. *Geogr Res* **2020**, 39(06): 1233-1241.
5. Li, Y.; Ma, J.; Liu, D. Assessment of heavy metal pollution and potential ecological risk in Kaifeng urban soils. *Chin J Envir Sci* **2015**, 36(03): 1037-1044
6. China National Environmental Monitoring Centre. Background values of soil elements in China: Beijing, China, **1990**.
